# Supplementary material for: Direct determination of chromium in empty medicine capsules by tungsten coil atomic emission spectrometry
Source: Royal Society of Chemistry journal article supplement (doi:10.1039/c5ja00100e), 2015-01-01

## Supplementary Material

**Fig 1S.** Tungsten coil atomizer 1:1 image projected slightly off axis to the entrance slit of the spectrograph.

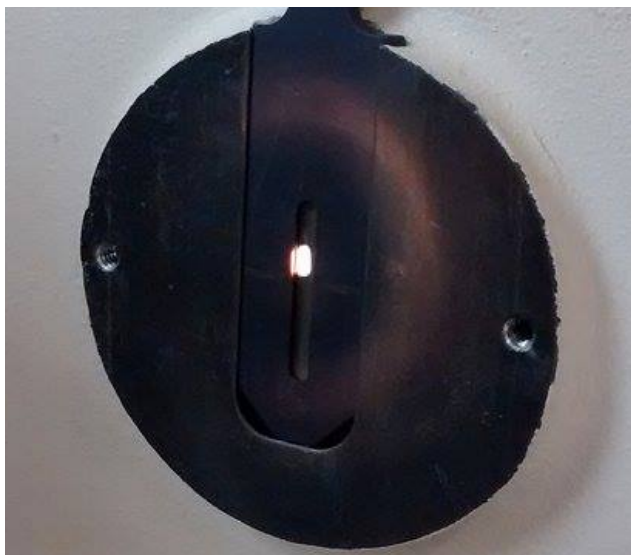

**Fig 2S.** Identification of medicine capsule samples evaluated in this study.

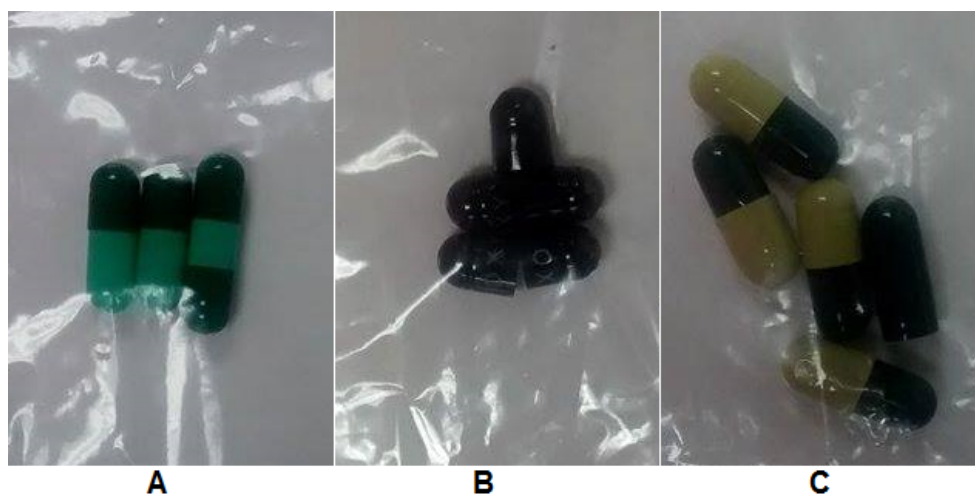

Supplement: c5ja00100e1.pdf [file c5ja00100e1.pdf]
